# Supplementary material
Source: PubMed Central journal article supplement (PMC2954609)
Supplement: NIHMS235104-supplement-1_si_001.pdf [file NIHMS235104-supplement-1_si_001.pdf]

**Supporting Information for:**

**$^2\text{H}$ ,  $^{15}\text{N}$ -Substituted Nitroxides as Sensitive Probes  
for Electron Paramagnetic Resonance Imaging**

Scott R. Burks,<sup>†,¶</sup> Justin Bakhshai,<sup>‡</sup> Mallory A. Makowsky,<sup>‡</sup> Sukumaran Muralidharan,<sup>†</sup>

Pei Tsai,<sup>†,‡</sup> Gerald M. Rosen<sup>\*,†,‡</sup> and Joseph P.Y. Kao<sup>†,¶</sup>

<sup>†</sup>Center for Biomedical Engineering and Technology, University of Maryland, Baltimore, MD  
21201 and Center for EPR Imaging In Vivo Physiology, University of Maryland, Baltimore,  
MD 21201

<sup>¶</sup>Department of Physiology, University of Maryland School of Medicine, Baltimore, MD, 21201

<sup>‡</sup>Department of Pharmaceutical Sciences, University of Maryland School of Pharmacy,  
Baltimore, MD 21201

[grosen@umaryland.edu](mailto:grosen@umaryland.edu)

**Table of Contents**

|                                                                                                |   |
|------------------------------------------------------------------------------------------------|---|
| Supplemental Methods.....                                                                      | 2 |
| Effect of modulation amplitude on spectral linewidth of nitroxides <b>2</b> and <b>7</b> ..... | 3 |
| Relative linewidths of <b>2</b> and <b>7</b> at 0.5 G modulation amplitude.....                | 3 |
| HPLC analysis of compound <b>6</b> .....                                                       | 4 |

## SUPPLEMENTAL METHODS

**EPR Spectroscopy.** EPR spectra were recorded on an X-band spectrometer at the following settings: microwave power, 20 mW; microwave frequency, 9.55 GHz; field set, 3335 G for  $^{14}\text{N}$  or 3324 G for  $^{15}\text{N}$ ; modulation frequency, 1 kHz; modulation amplitude, 0.008 – 0.5 G; field sweep, 4 G at  $13.3 \text{ G min}^{-1}$ . These settings encompassed the central spectral peak of the  $^{14}\text{N}$  spectrum, or the first spectral peak of the  $^{15}\text{N}$  spectrum. EWWIN software was used to digitize spectral data.

**EPR Spectral Linewidth Measurements.** To assess the effect of  $\text{O}_2$  on the EPR linewidths of the nitroxides, deionized  $\text{H}_2\text{O}$  ( $18.3 \text{ M}\Omega\cdot\text{cm}$  resistivity) was sparged with  $\text{N}_2$ , equilibrated with air, or sparged with  $\text{O}_2$  at  $24^\circ\text{C}$  for 30 min, to yield samples containing  $\text{O}_2$  at 0.003 mM, 0.25 mM and 1.25 mM ( $\text{O}_2$ -saturated; 18), respectively. Stock solutions (10 mM) of the  $\text{K}^+$  salt of nitroxide **2** or **7** were diluted 500-fold into the gas-equilibrated  $\text{H}_2\text{O}$  samples to a final nitroxide concentration of 20  $\mu\text{M}$ . Each solution was transferred into a flat quartz EPR cell previously purged with the appropriate gas. The quartz cell was sealed, and immediately positioned in the EPR spectrometer. Duplicate spectroscopic measurements on the samples were performed in random order with a modulation amplitude of 0.5 G. Reported linewidths are the peak-to-peak width of the central spectral line of **2**, and the first spectral line of **7**.

## SUPPLEMENTAL FIGURES

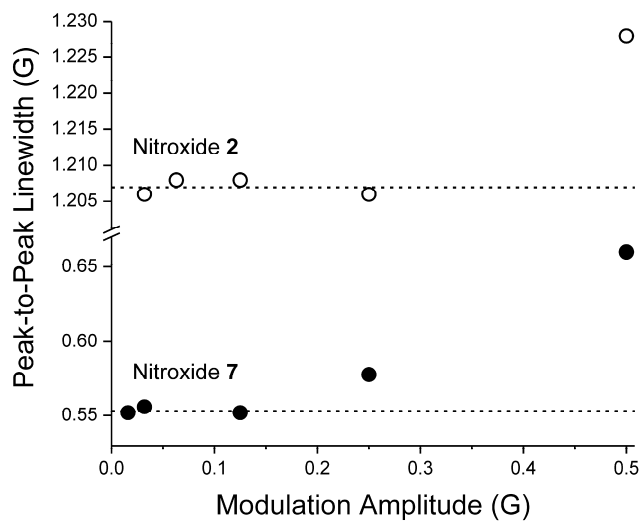

**Figure S1.** Effect of magnetic field modulation amplitude on EPR spectral linewidth of nitroxides **2** and **7**. Peak-to-peak linewidths were measured for nitroxides **2** and **7** at different values of the modulation amplitude in the range 0.008 – 0.5 G. Each point is the average of two measurements. Dashed lines indicate the limiting linewidths attained at low modulation amplitudes:  $1.207 \pm 0.001$  G for **2** and  $0.553 \pm 0.002$  G for **7**. The  $\text{K}^+$  salt of each nitroxide was used at 20  $\mu\text{M}$  in air-equilibrated  $\text{H}_2\text{O}$ .

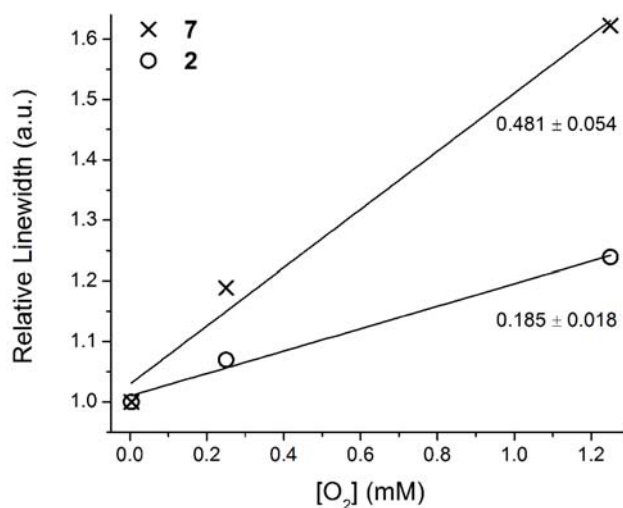

**Figure S2.** Relative linewidths of nitroxides **2** and **7** at different  $\text{O}_2$  concentrations in water. For each nitroxide, the linewidths were normalized to the value measured at 0.003 mM  $\text{O}_2$  (in  $\text{N}_2$ -sparged water). The measurements were identical to those in Figure 2 of the main text, except that the modulation amplitude was increased to 0.5 G. Solid lines are least-squares fits of the data; the slope of each line is indicated on the graph.

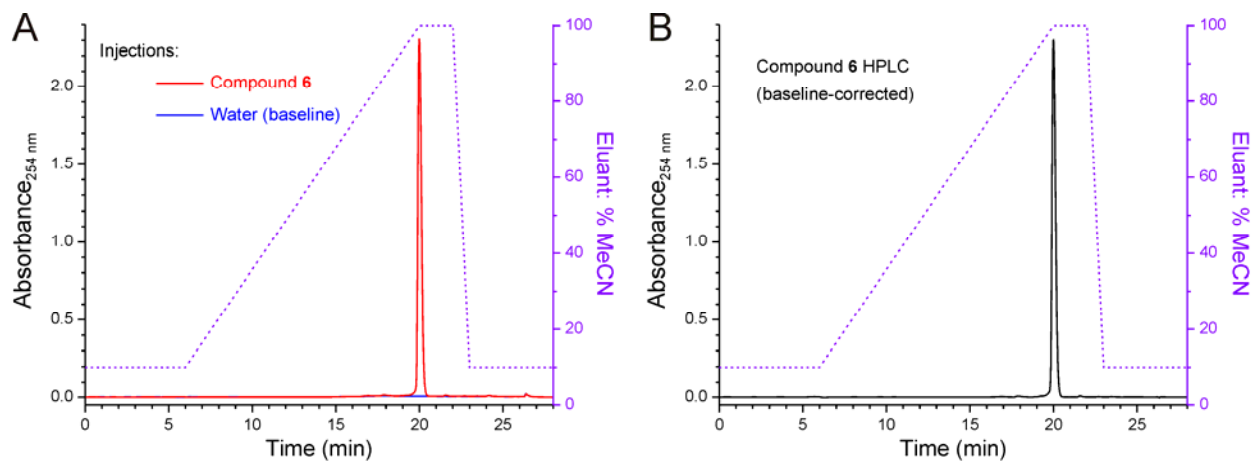

**Figure S3.** Reverse-phase HPLC analysis of compound **6**. A binary eluant system was used: water containing 0.1% v/v  $F_3CCO_2H$ , and acetonitrile. (A) HPLCs recorded after injection of water (blue) and after injection of compound **6** (red). Composition of the eluant (% MeCN) is indicated by the dashed line (violet). (B) Baseline-corrected HPLC of compound **6**, obtained by subtracting the baseline trace (blue) from the analytical trace (red) of panel (A). A C-18 column was used for the analysis.
